# Supplementary material
Source: PubMed Central journal article supplement (PMC2222962)

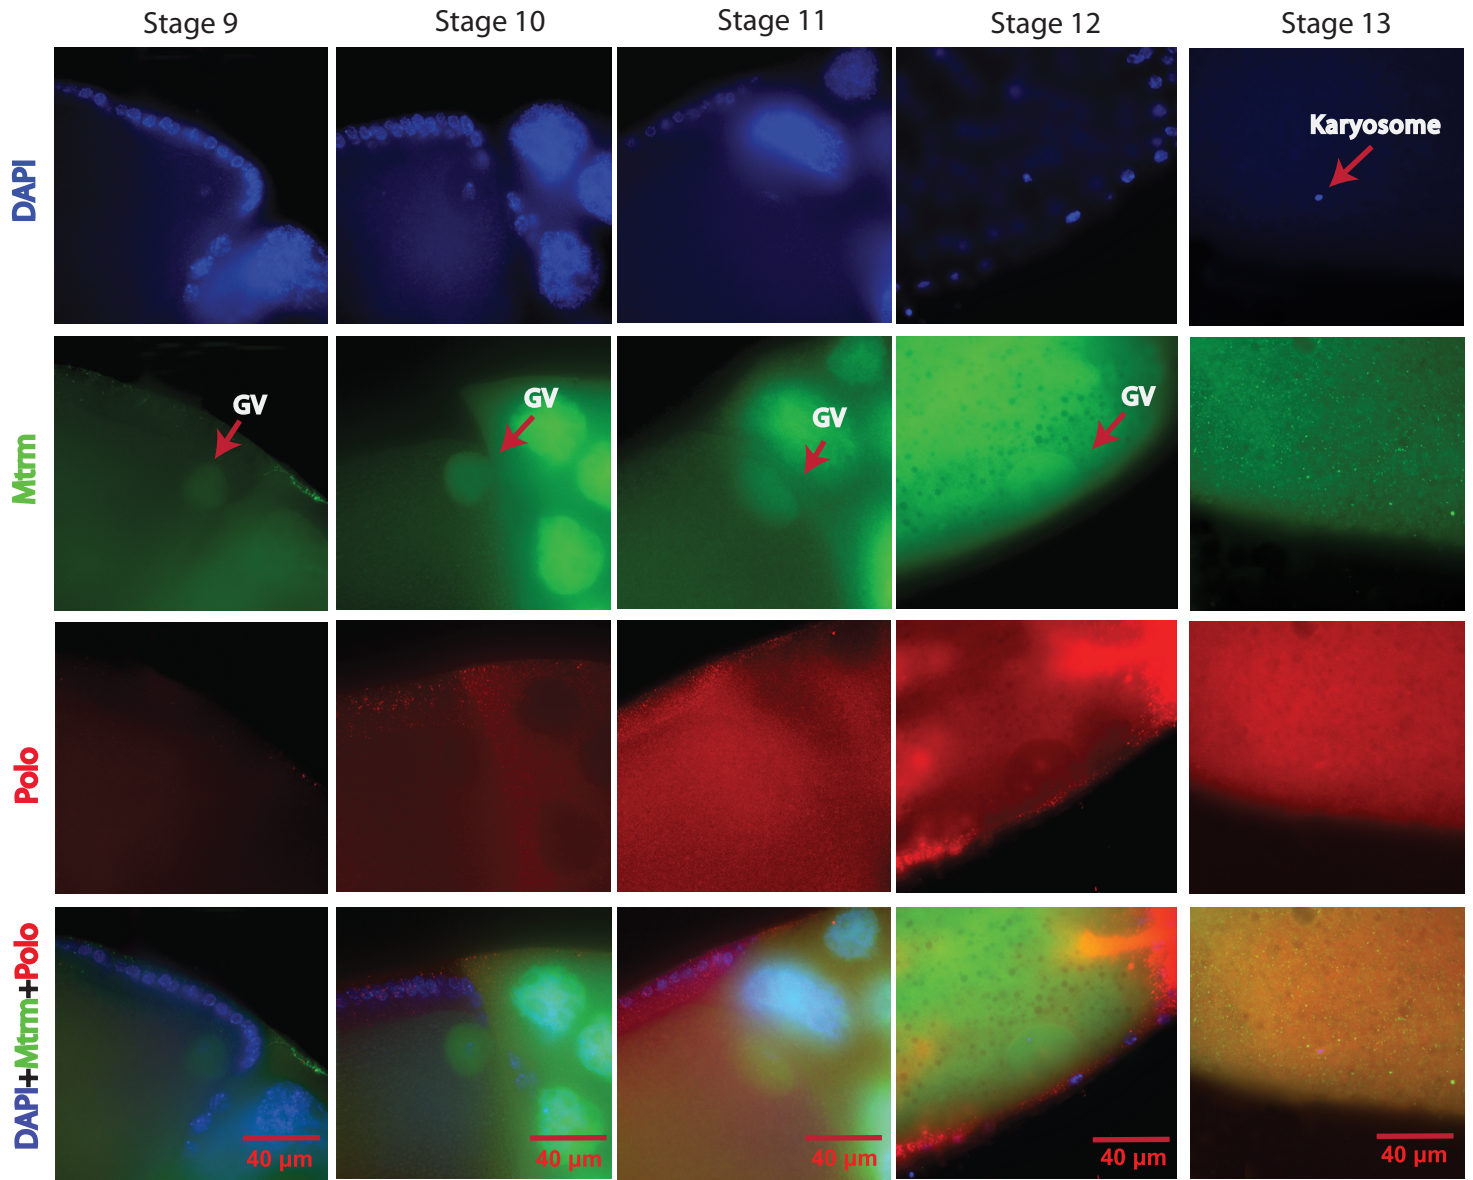

Suppl. Figure 1

Supplement: pbio.0050323.sg001.pdf [file pbio.0050323.sg001.pdf]

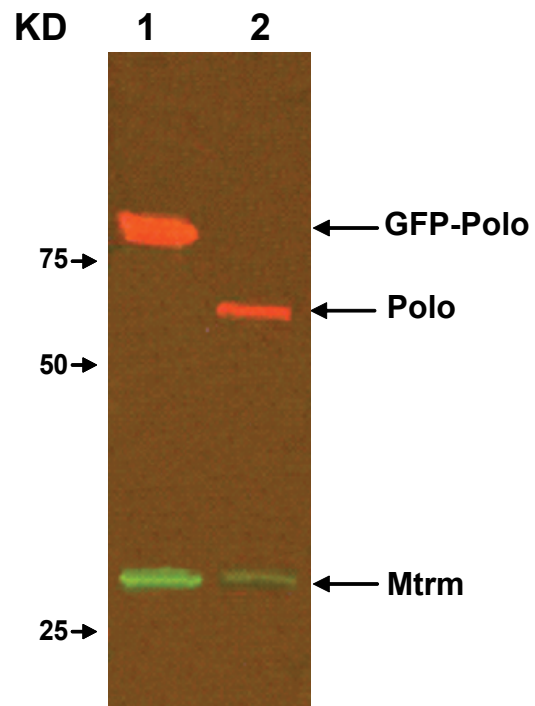

Suppl. Figure 2

Supplement: pbio.0050323.sg002.pdf [file pbio.0050323.sg002.pdf]
